# Supplementary material
Source: Springer Nature journal article supplement (https://springermedizin.de/resource/supplementary/13054_2011_960_MOESM2_ESM.pdf/9708804)
Supplement: MOESM2 [file 9708804]

### **CONTROL GROUP**

Patients treated >4 days in ICU  
in control period  
(January –December 2006)  
**n=151**

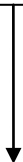

Died 31 % (n=46) and excluded (n=3)

Non-Swedish speaking: 2  
Lived abroad: 1

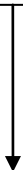

**Eligible for Questionnaires in  
control group (n=102)**

Received questionnaires 14  
months after ICU discharge

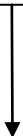

Did not respond: 29

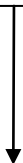

**Responders in control group  
(n=73)**

Response rate: 72%

### **FOLLOW-UP GROUP**

Patients treated >4 days in ICU  
in intervention period  
(January 2007- September 2008)  
**n=259**

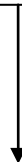

Died 31% (n=79) and excluded (n=24)

Non-Swedish speaking: 10  
Lived abroad: 5  
Attended other follow-up: 5  
Unknown address: 4

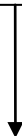

**Eligible for Questionnaires in  
follow-up group (n=156)**

Received questionnaires 14  
months after ICU discharge

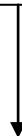

Did not respond: 58

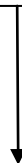

**Responders in follow-up group  
(n=98)**

Response rate: 63 %
